# Supplementary material
Source: publisher site journal article supplement (https://www.dovepress.com/article/592692)
Supplement: Supplementary file 1 [file Supplement%20material%20files%20%252528qualitative%20study%252529.docx]

**Supplementary 1: Guidelines, Recommendations, Adaptations, Including Disability (GRAIDs) Framework**

The Guidelines, Recommendations, Adaptations Including Disability (GRAIDs) framework offers guidance for adapting programs for individuals with disabilities by identifying design and implementation related challenges in 5 inclusion domains.

Inclusion Domains: A common set of items used to ensure participation by individuals with disabilities in an existing health promotion program or strategy. The five inclusion domains are: Built Environment, Service, Instruction, Equipment & Technology, and Policy.

1. **Built Environment**: Structural features.

Examples include ramps, signage, clear paths/sidewalks, curb cuts, hard floor surfaces, park play equipment, adequate temperature and lighting.

1. **Service**: Person-to-person assistance or other assistance that increases participation.

Examples: providing transportation, a personal shopping aide for a person with a disability, a peer assistant in a physical activity program, and inclusive advertisement or communication.

1. **Instruction**: (Training & Education) Technique(s) used to enhance learning for the staff within an organization or for the individual with a disability and their family members or caregivers.

Examples: webinars, lunch and lessons, in-service trainings, seminars

1. **Equipment & Technology**: Products or tools used to promote and allow for participation.

Examples: sports-related products, exercise tools, utensils, automatic sliding doors, bus lifts, communication devices.

1. **Policy**: Laws, regulations, rules, protocols, and procedures designed to guide or influence behavior. Policies can be either legislative or organizational in nature.

**Supplementary 2: Mindfulness, Exercise and Nutrition to Optimize Resilience (MENTOR) Program**

This program was delivered for 5 days/week for 8 weeks.All sessions were delivered synchronously in real time using telehealth technology via the “Healthie” platform. Participants were also encouraged to engage with supplemental resources, including recorded exercise demonstrations, nutrition recipe videos, mindfulness training recordings and health coaching power points, to reinforce session content. In addition, all participants received a program manual.

**Exercise Training:**

Exercise training sessions were led by a certified exercise specialist and delivered twice weekly for 45–60 minutes per session over an 8-week period. Each session was structured into two components. The initial half included instruction in proper exercise technique, postural alignment, and safety considerations, followed by supervised exercise practice. Sessions incorporated both recorded video demonstrations and live instructor-led demonstrations. Each exercise was taught and performed in seated, standing, and supine positions, allowing adaptations based on participants’ functional abilities and symptom tolerance.

The training program incorporated postural awareness, core strengthening, balance training, flexibility, aerobic exercise, and resistance training using TheraBand®. All exercises were individually adapted to participants’ functional abilities and symptom tolerance to ensure safety and promote engagement.

**Mindfulness:**

Mindfulness sessions were led by a trained mindfulness coach and delivered once weekly for 45–60 minutes over an 8-week period. Sessions focused on practical strategies for integrating mindfulness into everyday life. Techniques included guided breath-focused meditation, self-compassion and awareness practices, body scan meditation, guided visualization, gratitude meditation, and loving-kindness practice.

**Nutrition:**

Nutrition sessions were led by a registered dietitian and delivered once weekly for 45–60 minutes over an 8-week period. Sessions focused on practical nutrition skills, including meal preparation, exploring new recipes that emphasize increased fruit and vegetable consumption, and grocery budgeting strategies to support healthier food choices while reducing intake of processed foods. All recommended foods and dietary guidance aligned with standards set by the Women, Infants, and Children (WIC) program and the Supplemental Nutrition Assistance Program (SNAP).

**Health coaching:**

Health coaching sessions were facilitated by healthcare practitioners trained in motivational interviewing techniques. Sessions were delivered once weekly for 45–60 minutes over an 8-week period and were designed to support participants in developing and sustaining effective self-management strategies. Health coaches provided ongoing encouragement and individualized support to promote positive lifestyle behavior change.

Sessions emphasized collaborative goal setting, guided self-reflection, and journaling. Each session included a structured review of participants’ goals and progress across key domains, including exercise, mindfulness, and nutrition. Educational content was delivered via PowerPoint presentations covering topics such as goal setting, core values, self-care, relationships, rest and relaxation, time in nature, contribution to others, arts and leisure, and spiritual practices. Participants were encouraged to actively engage in group discussions and share experiences and insights related to health-related behaviors, fostering peer learning and mutual support.

**Home exercise kit**

One week prior to program initiation, participants were shipped a standard home exercise kit containing resistance bands, hand weights, foot pedaler, stability disk, pilates ball, a yoga mat, small food chopper and a program manual that summarized key information from each component and included dedicated space for goal setting and self-reflection.
